# Supplementary material
Source: publisher site journal article supplement (https://www.spandidos-publications.com/6350/downloadSupplementary)

Figure S1. Cell viability analyzed by Cell Counting Kit 8 in the control and Oroxylin A treated group. OD, optical density

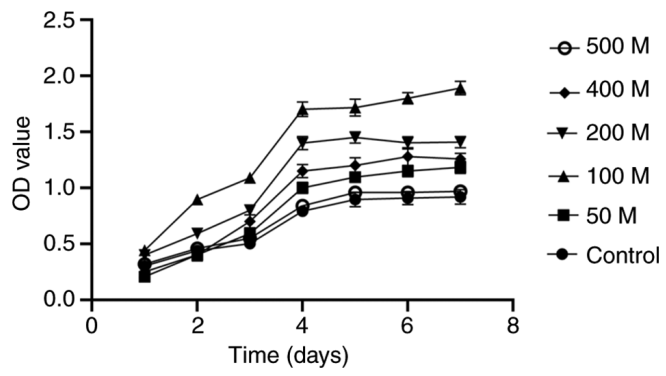

Supplement: Supplementary file 1 [file downloadSupplementary]
